# Supplementary material
Source: PubMed Central journal article supplement (PMC5800423)

**Supplementary Figure 1.** Immunohistochemistry for COX2 in the chorioamniotic membranes. Representative images (**A**) and semi-quantification (**B**) of COX2 in the chorioamniotic membranes from women who underwent spontaneous preterm labor (n = 7) or labor at term (n = 8). Gestational age-matched non-labor controls were also included (n = 7-8 each). 20x magnification.

**Supplementary Figure 2.** Validation of relative telomere length in peripheral blood mononuclear cells. Relative telomere length in peripheral blood mononuclear cells using two sets of primers (primer set #1 and primer set #2) from two individuals (a 25 year old and a 52 year old).

Supplementary Table 1: List of genes used in the RT-qPCR validation

| Symbol              | Gene Name                            | Assay ID      | Lot     |
|---------------------|--------------------------------------|---------------|---------|
| <i>TP53</i>         | Tumor Protein p53                    | HS01034249_m1 | 1366180 |
| <i>CDKN1A (P21)</i> | Cyclin-Dependent Kinase Inhibitor 1A | HS00355782_m1 | 1347306 |
| <i>CDK2</i>         | Cyclin-Dependent Kinase 2            | HS01548894_m1 | 1356790 |
| <i>CCNA2</i>        | Cyclin A2                            | HS00996788_m1 | 1351631 |
| <i>CCNB1</i>        | Cyclin B1                            | HS01030099_m1 | 1323891 |
| <i>CCNE1</i>        | Cyclin E1                            | HS01026536_m1 | 1320002 |
| <i>ACTB</i>         | Beta-Actin                           | Hs99999903_m1 | 1086982 |

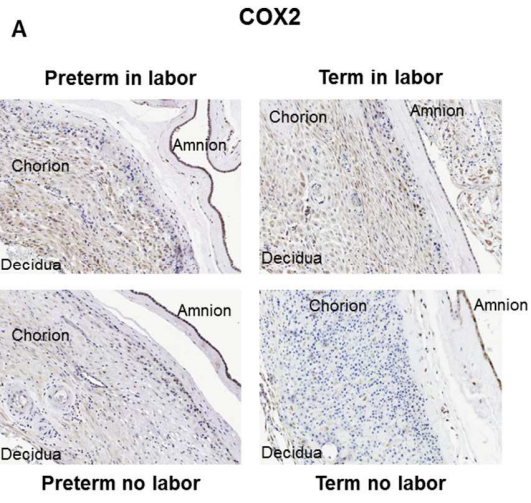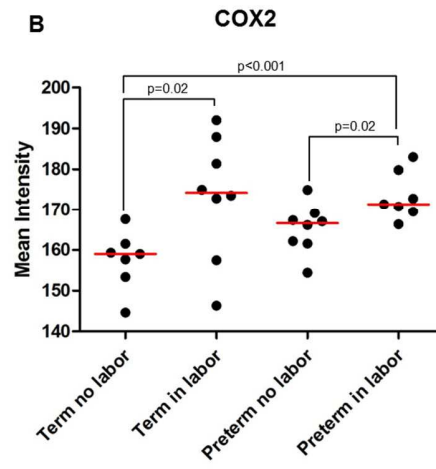

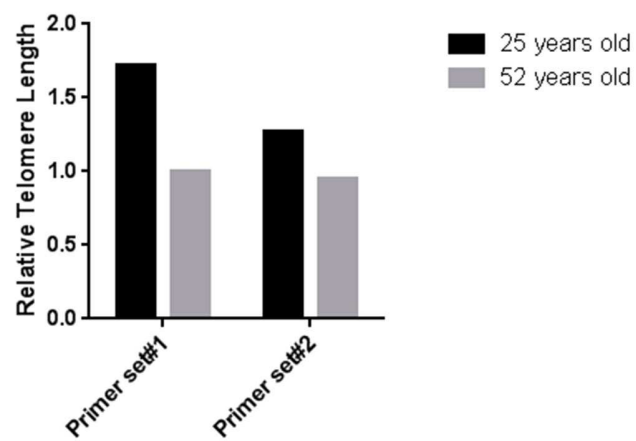

Supplement: NIHMS902213-supplement-supplement_1.pdf [file NIHMS902213-supplement-supplement_1.pdf]
